# Supplementary material for: Disruption of endosomal trafficking with EGA alters TLR9 cytokine response in human plasmacytoid dendritic cells
Source: Frontiers journal article supplement (doi:10.3389/fimmu.2023.1144127), 2023-03-20
Supplement: Data_Sheet_1.PDF [file Data_Sheet_1.PDF]

## *Supplementary Material*

### **Disruption of endosomal trafficking with EGA alters TLR9 cytokine response in human plasmacytoid dendritic cells**

**Matthew J Wiest<sup>1,2</sup>, Chao Gu<sup>1</sup>, Hyoungjun Ham<sup>3</sup>, Laurent Gorvel<sup>4</sup>, Mira T Keddis<sup>5</sup>, Leroy W Griffing<sup>6</sup>, HyeMee Joo<sup>1,2</sup>, Jean-Pierre Gorvel<sup>7</sup>, Daniel D Billadeau<sup>3</sup>, SangKon Oh<sup>1, 2\*</sup>**

<sup>1</sup>Department of Immunology, Mayo Clinic, Scottsdale, AZ, USA

<sup>2</sup>Baylor Institute of Biomedical Studies, Baylor University, Waco, TX, USA

<sup>3</sup>Department of Immunology, Mayo Clinic, Rochester, MN, USA

<sup>4</sup>CRCM, Aix Marseille Universite, INSERM, Marseille, France

<sup>5</sup>Department of Nephrology, Mayo Clinic, Scottsdale, AZ, USA

<sup>6</sup>Department of Rheumatology, Mayo Clinic, Scottsdale, AZ, USA

<sup>7</sup>CIML, Aix Marseille Universite, INSERM, Marseille, France

**\* Correspondence:** SangKon Oh: Oh.Sangkon@mayo.edu

This file includes:

**Supplementary Figure 1.** Kinetics of EGA-mediated suppression of cytokine expression in CpG-ODN2216-stimulated pDCs.

**Supplementary Figure 2.** EGA diminishes IFN $\alpha$  and TNF $\alpha$  secretion in CpG-DOTAP and gDNA/LL37 stimulated pDCs.

**Supplementary Figure 3.** EGA and PIKfyve inhibitors reduce CpG-ODN2216 cytokine secretion in pDCs.

**Supplementary Figure 4.** EGA and PIKfyve inhibitors do not affect blood pDC viability.

**Supplementary Figure 5.** Trace of CpG-ODN2216 in plasmacytoid dendritic cells.

**Supplementary Figure 6.** EGA- and YM201636-treatment decrease colocalization of CpG-ODN2216-FITC with LAMP1/2<sup>+</sup> compartments.

**Supplementary Figure 7.** EGA and YM201636 do not affect endo-lysosomal acidification.

**Supplementary Table 1.** Antibodies utilized in flow cytometry in this study.

**Supplementary Table 2.** Antibodies utilized in immunoblotting in this study.

**Supplementary Table 3.** Antibodies utilized in confocal microscopy in this study.

**Supplementary Table 4.** Information of SLE Patients recruited in this study.

Supplementary Figure 1

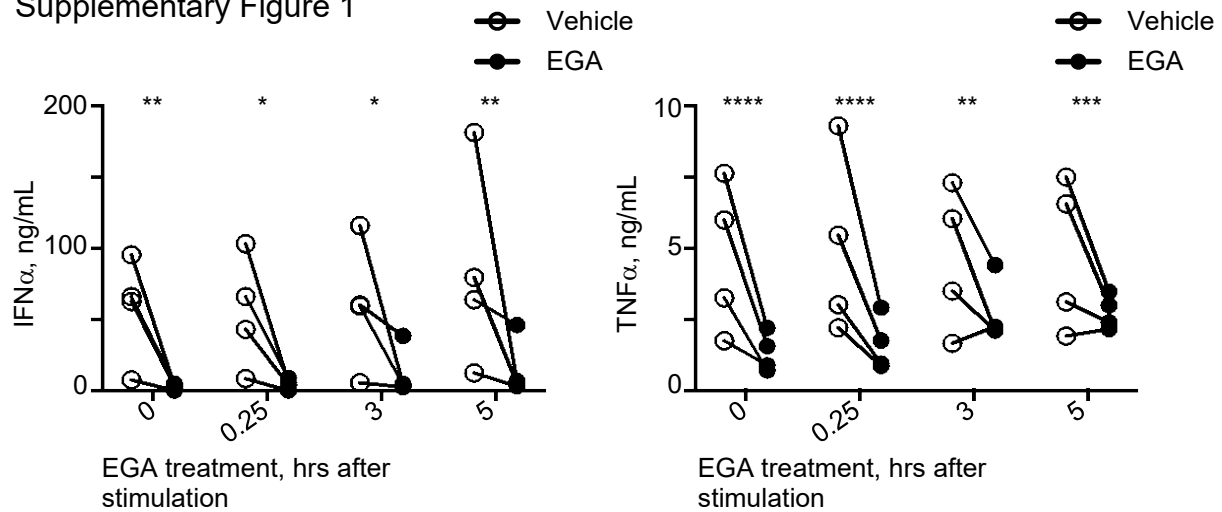

**Supplementary Figure 1. Kinetics of EGA-mediated suppression of cytokine expression in CpG-ODN2216-stimulated pDCs**

pDCs stimulated with CpG-ODN2216 overnight with 20  $\mu$ M EGA or vehicle added at time points post-CpG-ODN2216 stimulation. IFN $\alpha$  and TNF $\alpha$  concentrations in supernatants after overnight stimulation. Data from 4 different subjects analyzed by two-way ANOVA with Sidak multiple comparison test. \* $P$  < 0.05, \*\* $P$  < 0.01, \*\*\* $P$  < 0.001, \*\*\*\* $P$  < 0.0001, for comparison between groups.

Supplementary Figure 2

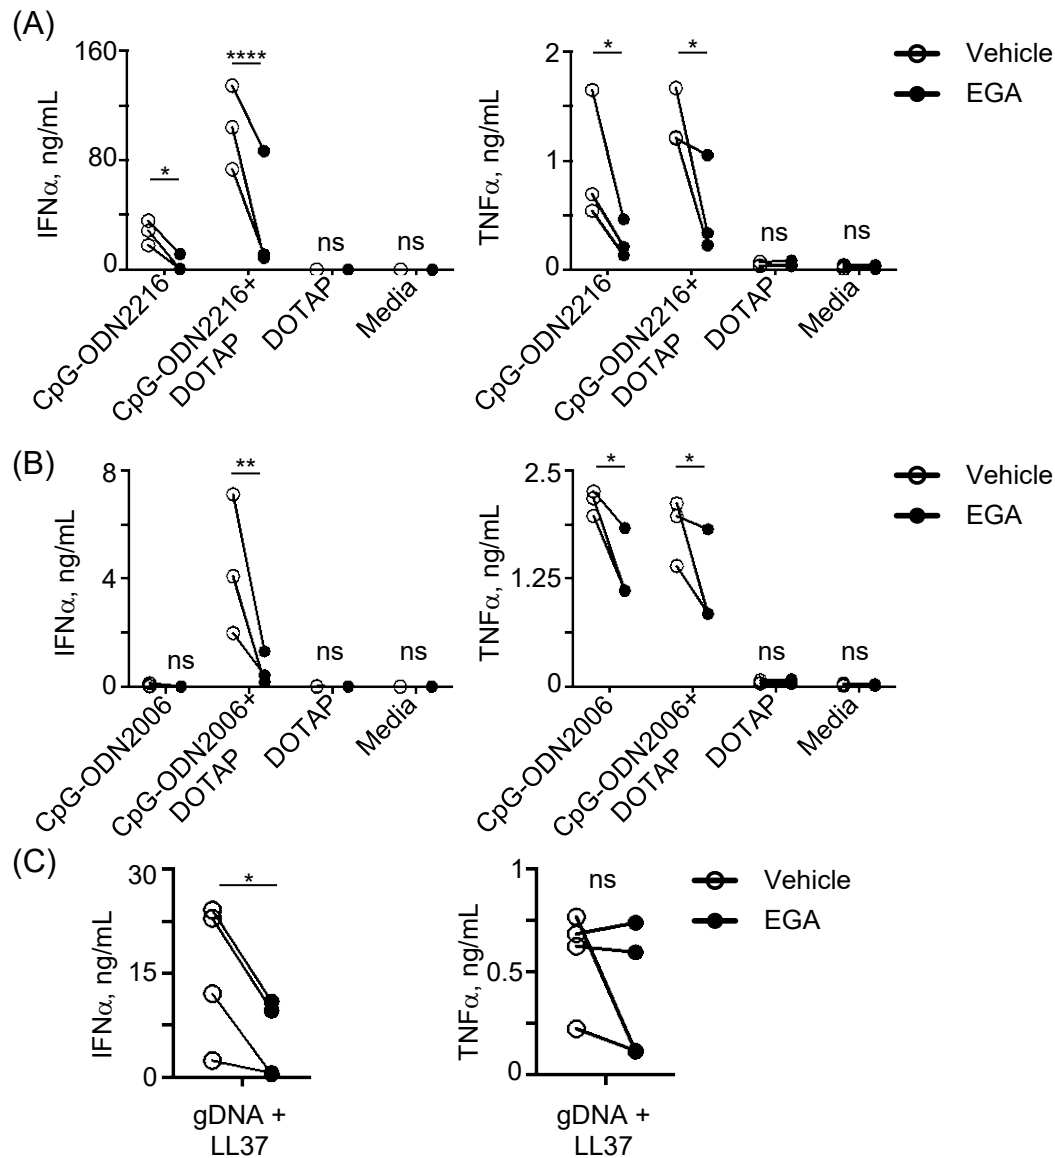

**Supplementary Figure 2. EGA diminishes IFN $\alpha$  and TNF $\alpha$  secretion by CpG-DOTAP- and gDNA/LL37-stimulated pDCs.**

IFN $\alpha$  and TNF $\alpha$  concentrations in supernatants of pDCs pre-treated with 20  $\mu$ M EGA or vehicle and stimulated with (A) CpG-ODN2216 with/out DOTAP, (B) CpG-ODN2006 with/out DOTAP, or (C) gDNA/LL37 overnight. Data from 3-4 different subjects analyzed by two-way ANOVA with Sidak multiple comparison test (A and B) or two-tailed paired t-test (C). \* $P$  < 0.05, \*\* $P$  < 0.01, \*\*\*\* $P$  < 0.0001, ns – not significant for comparison between groups.

Supplementary Figure 3

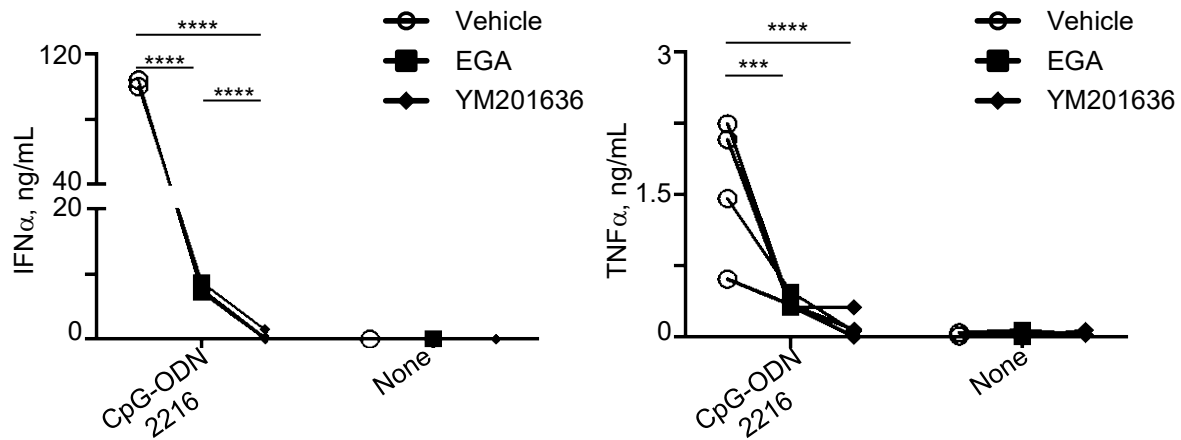

**Supplementary Figure 3. EGA and PIKfyve inhibitors reduce IFN $\alpha$  and TNF $\alpha$  secretion by CpG-ODN2216-stimulated pDCs.**

IFN $\alpha$  and TNF $\alpha$  levels in supernatants of pDCs pre-incubated with 20  $\mu$ M EGA, 1  $\mu$ M YM201636, or vehicle, and stimulated with CpG-ODN2216 overnight. Data were generated with pDCs isolated from 4 different subjects. Two-way ANOVA with Tukey multiple comparison test. \*\*\* $P$  < 0.001, \*\*\*\* $P$  < 0.0001, for comparison between groups.

Supplementary Figure 4

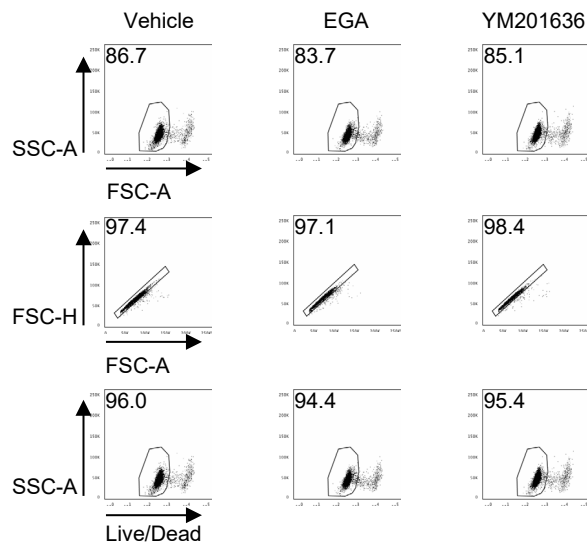

**Supplementary Figure 4. EGA and PIKfyve inhibitors do not affect blood pDC viability.**

Representative viability assessment of pDCs pre-incubated with 20 $\mu$ M EGA, 1 $\mu$ M YM201636, or vehicle, and stimulated with CpG-ODN2216 overnight.

## Supplementary Figure 5

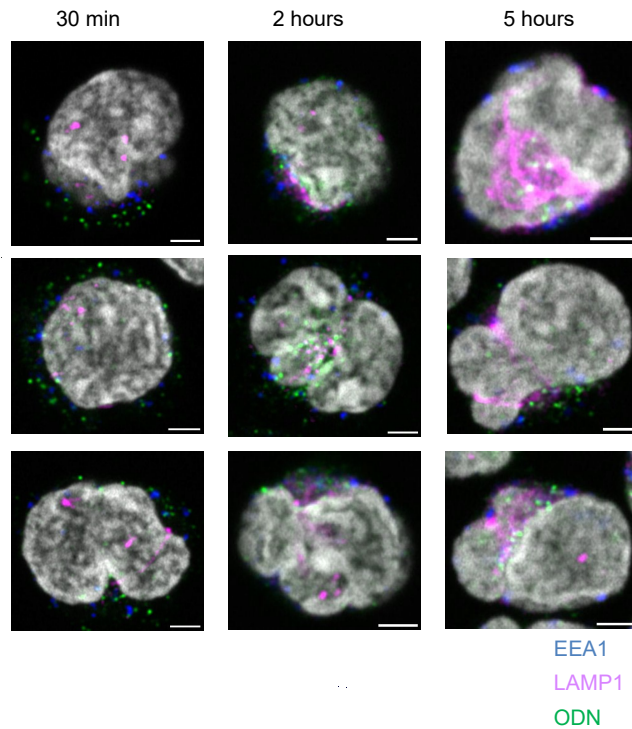

### Supplementary Figure 5. Trace of CpG-ODN2216 in pDCs.

pDCs were incubated with 1 $\mu$ M CpG-ODN2216 – FITC. Three representative images of CpG-ODN overlap with endolysosomal markers (EEA1, LAMP1) at each time point. Scale bar – 2 $\mu$ m

Supplementary Figure 6

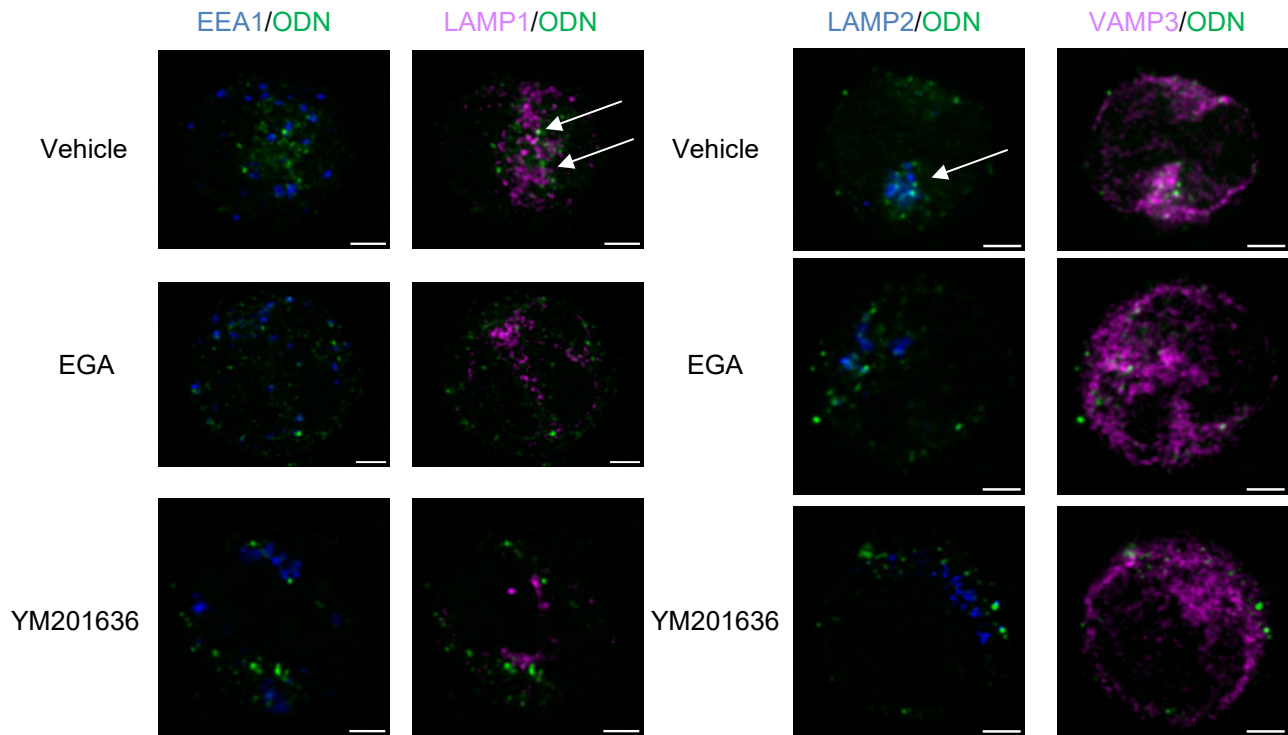

**Supplementary Figure 6. EGA- and YM201636-treatment decrease colocalization of CpG-ODN2216-FITC with LAMP1/2<sup>+</sup> compartments in pDCs.**

pDCs were pre-incubated with 20 $\mu$ M EGA, 1 $\mu$ M YM201636, or vehicle and stimulated with 1 $\mu$ M CpG-ODN2216-FITC. Representative images of colocalization of CpG-ODN2216-FITC with endo-lysosomal marker proteins (EEA1, VAMP3, LAMP2, LAMP1) at 2 hours post-stimulation. Scale bar – 2 $\mu$ m



## Supplementary Figure 7

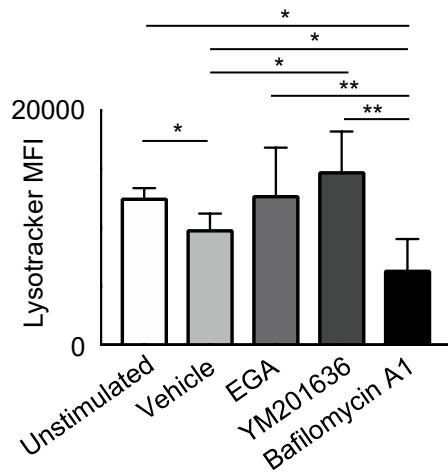

### **Supplementary Figure 7. EGA and YM201636 do not affect endo-lysosomal acidification.**

pDCs were pre-incubated with 20  $\mu$ M EGA, 1  $\mu$ M YM201636, 1  $\mu$ M Bafilomycin A1, or vehicle and stimulated with CpG-ODN2216 for 12 hours. CpG-ODN was washed out and cells were labeled with LysoTracker Deep Red and analyzed by flow cytometry. Data representative from 5 donors analyzed by one-way ANOVA with Tukey multiple comparison test. \* $P$  < 0.05, \*\* $P$  < 0.01, for comparison between groups.

Supplementary Table 1. Antibodies utilized in flow cytometry in this study.

| Antibody                | Clone    | Source          | Catalog                  |
|-------------------------|----------|-----------------|--------------------------|
| Anti-Human HLA-DR       | L243     | Biolegend       | 307618                   |
| Anti-Human HLA-DR       | G46-6    | BD              | 560651, 561359           |
| Anti-Human Lineage-1    | Various  | BD, Biolegend   | 340546, 363601           |
| Anti-Human CD3          | UCHT1    | BD, Biolegend   | 555335, 300412           |
| Anti-Human CD3          | Sk7      | BD              | 340440                   |
| Anti-Human CD14         | MφP9     | BD              | 557831                   |
| Anti-Human CD19         | HIB19    | BD              | 555415                   |
| Anti-Human CD20         | 2H7      | eBioscience     | 17-0209-42               |
| Anti-Human CD56         | B159     | BD              | 555518                   |
| Anti-Human CD123        | 9F5      | BD              | 551065, 563161           |
| Anti-Human CD123        | 7G3      | BD              | 560826                   |
| Anti-Human CD11c        | B-ly6    | BD              | 560369, 561355, 562393   |
| Anti-Human IFN $\alpha$ | LT27:295 | Miltenyi Biotec | 130-092-601, 130-123-708 |
| Anti-Human TNF $\alpha$ | Mab11    | Biolegend       | 502932, 502936           |
| Mouse IgG1 Isotype      | MOPC-21  | Biolegend       | 400114, 400158, 400162   |

Supplementary Table 2. Antibodies utilized in immunoblotting in this study.

| Antibody                                | Clone  | Catalog | Host   | Source |
|-----------------------------------------|--------|---------|--------|--------|
| Anti - ATF3                             | E9J4N  | 18665   | Rabbit | CST    |
| Anti - p-p65 (S536)                     | 93H1   | 3033    | Rabbit | CST    |
| Anti - p65                              | L8F6   | 6956    | Mouse  | CST    |
| Anti - p-IKK $\alpha/\beta$ (S176/S177) | C84E11 | 2078    | Rabbit | CST    |
| Anti - IK $\beta$ a                     | 44D4   | 4812    | Rabbit | CST    |
| Anti - p-Akt (S473)                     | N/A    | 9271    | Rabbit | CST    |
| Anti - Akt                              | C67E7  | 4691    | Rabbit | CST    |
| Anti - p-p38 (T180/Y182)                | 3D7    | 9215    | Rabbit | CST    |
| Anti - p38                              | N/A    | 9212    | Rabbit | CST    |
| Anti - pSTAT1 (Y701)                    | 58D6   | 9167    | Rabbit | CST    |
| Anti - STAT1                            | D1K9Y  | 14994   | Rabbit | CST    |
| Anti - IRF7                             | N/A    | 4920    | Rabbit | CST    |
| HRP - Anti - Mouse IgG                  | N/A    | 7076    | Horse  | CST    |
| HRP - Anti - Rabbit IgG                 | N/A    | 7074    | Goat   | CST    |

Supplementary Table 3. Antibodies utilized in confocal microscopy in this study.

| Antibody                             | Clone    | Catalog    | Host   | Source       | Dilution |
|--------------------------------------|----------|------------|--------|--------------|----------|
| Anti-EEA1                            | 14       | 610456     | Mouse  | BD           | 1:250    |
| Anti-VAMP3                           | EPR16866 | ab200657   | Rabbit | Abcam        | 1:500    |
| Anti-LAMP1                           | N/A      | ab24170    | Rabbit | Abcam        | 1:1000   |
| Anti-LAMP2                           | H4B4     | 354301     | Mouse  | Biolegend    | 1:500    |
| Rabbit Polyclonal IgG                | N/A      | LS-C149375 | Rabbit | LSBio        | 1:5000   |
| Mouse IgG1                           | MOPC-21  | 400102     | Mouse  | Biolegend    | 1:500    |
| Alexa Flour 488 Goat- Anti FITC      | N/A      | A11096     | Goat   | ThermoFisher | 1:1000   |
| Alexa Flour 568-Goat-Anti-Rabbit IgG | N/A      | A11036     | Goat   | ThermoFisher | 1:1000   |
| Alexa Flour 647-Goat-Anti-Mouse IgG  | N/A      | A21235     | Goat   | ThermoFisher | 1:1000   |

Supplementary Table 4. Information of SLE Patients recruited in this study.

| Patient | Age | Gender | Ethnicity           | SLEDAI -<br>2k | Clinical Status |
|---------|-----|--------|---------------------|----------------|-----------------|
| 1       | 59  | Female | White               | 8              | 2               |
| 2       | 39  | Female | White               | 8              | 2               |
| 3       | 44  | Female | White               | 12             | 2               |
| 4       | 57  | Male   | White               | 12             | 2               |
| 5       | 63  | Female | White               | 8              | 2               |
| 6       | 37  | Female | White               | 0              | 2               |
| 7       | 50  | Male   | Pacific<br>Islander | 7              | 2               |

Clinical Status

- 1: No disease activity, off medications
- 2: Disease in remission, on medication
- 3: Disease, relapsing
- 4: Treatment resistant
